# Supplementary material for: Utilization of compressible hydrogels as electrolyte materials for supercapacitor applications
Source: Royal Society of Chemistry journal article supplement (doi:10.1039/d3ra00893b), 2023-01-01
Supplement: d3ra00893b1.pdf [file d3ra00893b1.pdf]

## Electronic Supplementary Information

### Utilization of compressible hydrogel as an electrolyte material for supercapacitor application

Amrita Jain<sup>1#</sup>, Yasamin Ziai<sup>1#</sup>, Kamil Bochenek<sup>1</sup>, Sai Rashmi Manippady<sup>1</sup>, Filippo Pierini<sup>1</sup>, Monika Michalska<sup>2\*</sup>

<sup>1</sup>Institute of Fundamental Technological Research, Polish Academy of Sciences, Pawińskiego 5B, 02-106 Warsaw, Poland

<sup>2</sup>Department of Chemistry and Physico-Chemical Processes, Faculty of Materials Science and Technology, VŠB-Technical University of Ostrava, 17. listopadu 2172/15, 708 00 Ostrava-Poruba, Czech Republic

\*Corresponding author: [monika.kinga.michalska@gmail.com](mailto:monika.kinga.michalska@gmail.com)

#Equal Contributors

**Video S1.** Video of the hydrogel network embedded with carbon nanoparticles under five cycles of compression shows the network's ability to gain the original shape after 40% of specimen strain.

**Video S2 and Video S3.** Video of the hydrogel network embedded with carbon nanoparticles bending and folding. The video shows the ability of the system to stay in its original shape and not break into pieces.
